# Supplementary material for: Graphene nanodots decorated ultrathin P doped ZnO nanosheets as highly efficient photocatalysts
Source: Royal Society of Chemistry journal article supplement (doi:10.1039/c6ra11446f), 2016-01-01
Supplement: c6ra11446f1.pdf [file c6ra11446f1.pdf]

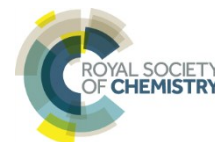

RSC Advances

PAPER

Supporting Information

## Graphene nanodots decorated ultrathin P doped ZnO nanosheets for highly efficient photocatalyst

Yuankun Zhu,<sup>a</sup> Xiuming Bu,<sup>a</sup> Ding Wang,<sup>a</sup> Ping Wang,<sup>a</sup> Aiying Chen,<sup>a</sup> Qian Li,<sup>b,c</sup> Junhe Yang<sup>a</sup> and Xianying Wang<sup>\*a</sup>

<sup>a</sup> School of Materials Science and Engineering, University of Shanghai for Science & Technology, Shanghai, 200093, China.

<sup>b</sup> State Key Laboratory of Advanced Special Steel & Shanghai Key Laboratory of Advanced Ferrometallurgy & School of Materials Science and Engineering, Shanghai University, 149 Yanchang Road, Shanghai 200072, China

<sup>c</sup> Materials Genome Institute, Shanghai University, 99 Shangda Road, Shanghai 200444, China

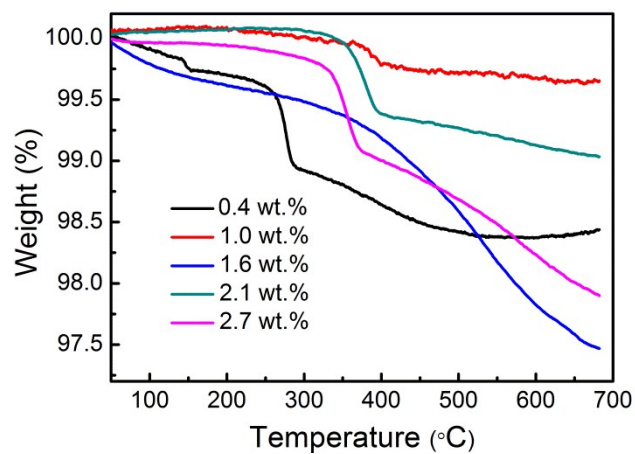

**Fig. S1** Thermogravimetric Analysis (Pyris 1, PerkinElmer) of ZnO:P/GNDs composites with different amounts of GNDs. Weight ratios of the five samples are about 0.4 wt.%, 1.0 wt.%, 1.6 wt.%, 2.1 wt.%, and 2.7 wt.%, respectively.

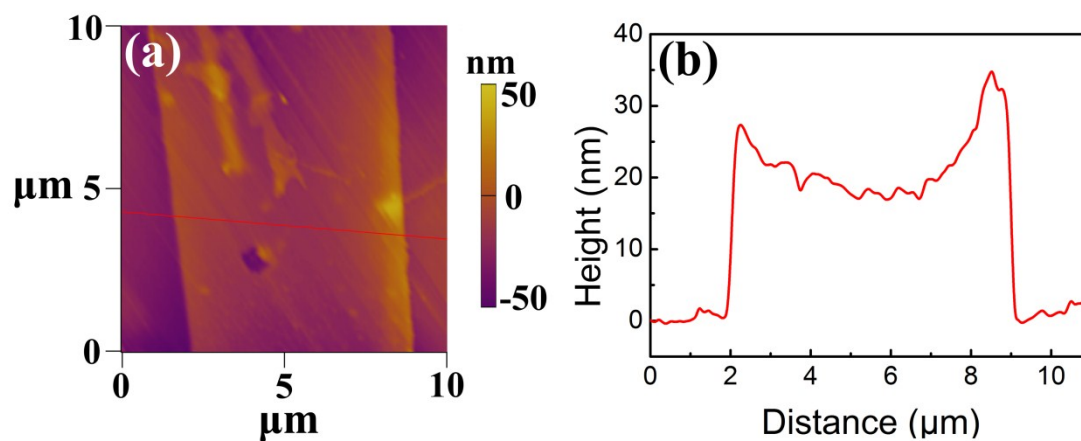

**Fig. S2** (a) AFM height topography and (b) cross-sectional profiles of as-grown ZnO:P nanosheets. The mean thickness of ZnO:P nanosheets is about 20-30 nm.

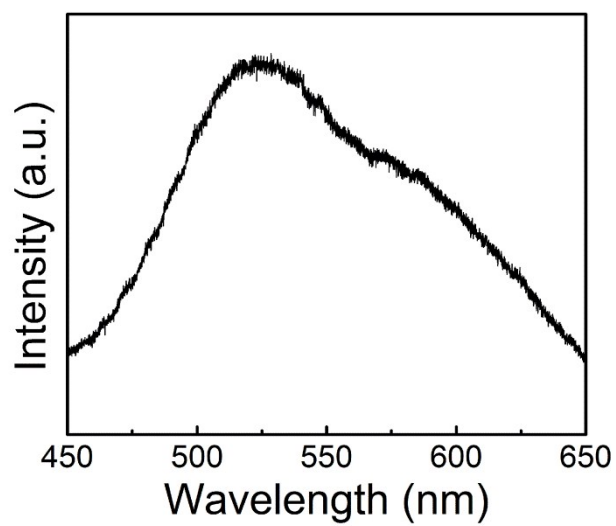

**Fig. S3** PL spectra of graphene nanodots. The emission peak is located at 526 nm.

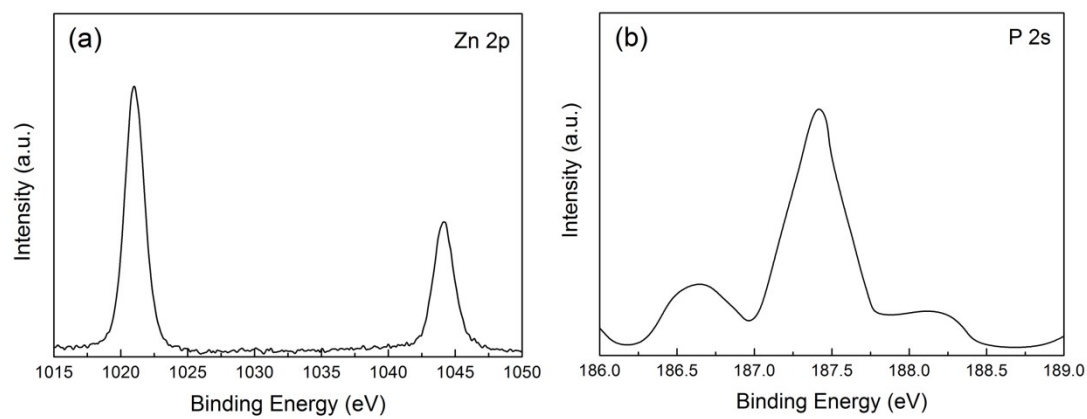

**Fig. S4** XPS spectra of ZnO:P nanosheets, (a) the Zn 2p spectrum and (b) the P 2s spectrum.

**Table S1** Apparent rate constants  $k$  calculated according to the UV-VIS spectra for degrading RhB of ZnO:P/GNDs with different amounts of GNDs.

| GNDs ratio               | 0     | 0.4 wt. % | 1.0 wt. % | 1.6 wt. % | 2.1 wt. % | 2.7 wt. % |
|--------------------------|-------|-----------|-----------|-----------|-----------|-----------|
| $k$ (min <sup>-1</sup> ) | 0.131 | 0.210     | 0.254     | 0.442     | 0.287     | 0.266     |
